# Supplementary material
Source: PubMed Central journal article supplement (PMC3746517)

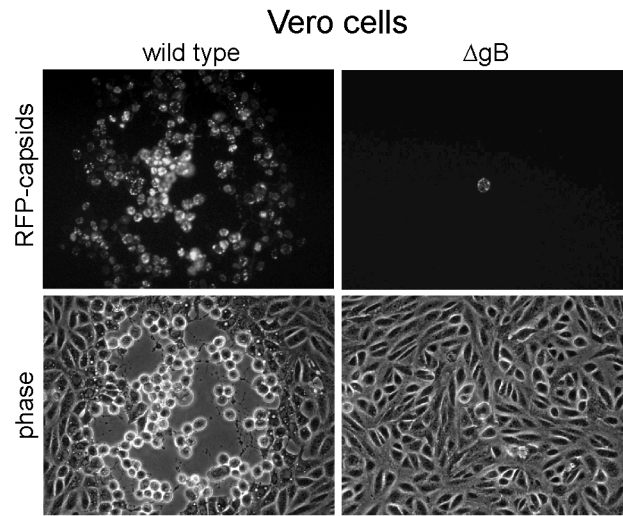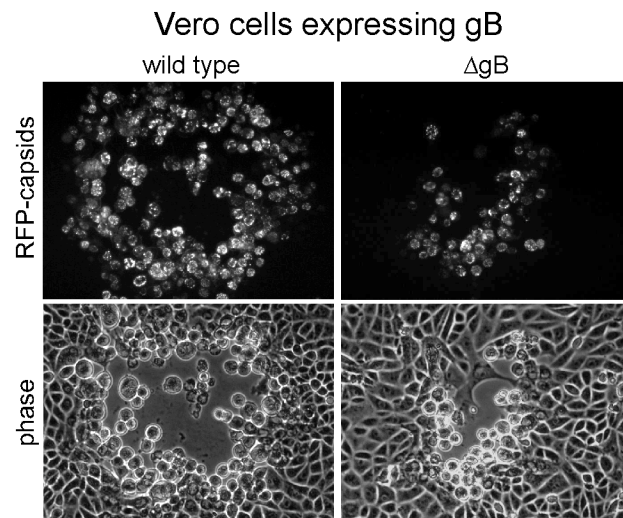

**SUPPLEMENTAL FIGURE 4**

Supplement: NIHMS210980-supplement-Supp_Fig_4.pdf [file NIHMS210980-supplement-Supp_Fig_4.pdf]

Anterograde moving  
TMR-Dextran labeled vesicles

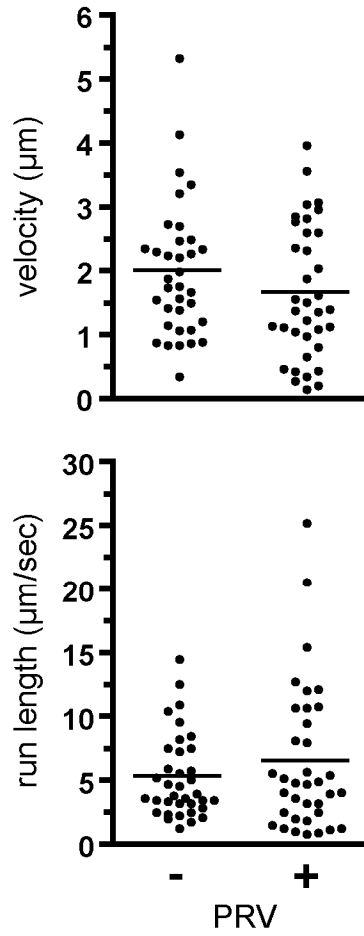

SUPPLEMENTAL FIGURE 5

Supplement: NIHMS210980-supplement-Supp_Fig_5.pdf [file NIHMS210980-supplement-Supp_Fig_5.pdf]
